# Supplementary material for: Identification of Mechanisms of Resistance to ALK Inhibitors. Next-generation sequencing-based liquid biopsy profiling: A step towards personalized treatment.
Source: Research Square preprint supplement (doi:10.21203/rs.3.rs-86055/v1), 2020-10-08
Supplement: Supplementary file 1 [file 0fc4d50bfe6a2bc2052cd56d.xlsx]

## Sheet: Hoja1
Sample	Gene (HUGO Symbol)	Amino Acid Change	Nucleotide Change / CytoBand	Type of mutation	Variant Class (Tier)	Transcript	rs	COSM
Sample 1	CCND3	p.T191T	c.573A>T	SNV	Unknown	NM_001760	-	-
Sample 1	TP53	p.P92A	c.274C>G	SNV	unknown	NM_000546.5	-	COSM45844
Sample 2	ALK	p.A1200V	c.3599C>T	SNV	Strong Clinical Significance	NM_004304.4	rs200585833	COSM317003
Sample 2	TP53	p.A88Rfs	c.261_262insC	InDel	unknown	NM_000546.5	-	-
Sample 2	TP53	p.M133T	c.398T>C	SNV	unknown	NM_000546.5	rs28934873	COSM43723
Sample 2	TP53	p.P92A	c.274C>G	SNV	unknown	NM_000546.5	-	COSM45844
Sample 3	ALK	p.G1269A	c.3806G>C	SNV	Strong Clinical Significance	NM_004304.4	rs1057519781	COSM1169707
Sample 3	TP53	p.L35fs	c.104_105insC	InDel	unknown	NM_000546.5	-	-
Sample 4	BRAF	p.G466V	c.1397G>T	SNV	Potential Clinical Significance	NM_004333.4	rs121913351	COSM451
Sample 4	TP53	p.G262Rfs	c.784insC	InDel	unknown	NM_000546.5	-	-
Sample 4	TP53	p.V197Gfs	c.590delT	InDel	unknown	NM_000546.5	-	COSM44655
Sample 6	ALK	p.G1269A	c.3806G>C	SNV	Strong Clinical Significance	NM_004304.4	rs1057519781	COSM1169707
Sample 7	ALK	p.G1202R	c.3604G>A	SNV	Strong Clinical Significance	NM_004304.4	rs1057519783	COSM144250
Sample 7	TP53	p.P92A	c.274C>G	SNV	unknown	NM_000546.5	-	COSM45844
Sample 8	ALK	p.L1196M	c.3586C>A	SNV	Strong Clinical Significance	NM_004304.4	rs1057519784	COSM99137
Sample 8	FGFR2	p.G305R	c.913G>A	SNV	Unknown	NM_000141.5	-	COSM29824
Sample 8	TP53	p.P92A	c.274C>G	SNV	unknown	NM_000546.5	-	COSM45844
Sample 8	TP53	p.R282W	c.844C>T	SNV	unknown	NM_000546.5	rs28934574	COSM10704
Sample 9	SMAD4	p.A118V	c.353C>T	SNV	Unknown	NM_005359.6	-	COSM14215
Sample 9	TP53	p.P92A	c.274C>G	SNV	unknown	NM_000546.5	-	COSM45844
Sample 9	TP53	p.V157F	c.469G>T	SNV	unknown	NM_000546.5	rs121912654	COSM10670
Sample 10	IDH2	p.R140Q	c.419G>A	SNV	Potential Clinical Significance	NM_002168.3	-	COSM41590
Sample 10	TP53	p.P92A	c.274C>G	SNV	unknown	NM_000546.5	-	COSM45844
Sample 11	MET	p.L7P	c.20T>C	SNV	Unknown	NM_001127500	-	-
Sample 11	TP53	p.G105C	c.313G>T	SNV	unknown	NM_000546.5	-	COSM44481
Sample 12	MAP2K1	p.F129L	c.385T>C	SNV	Potential Clinical Significance	NM_002755.3	rs1057519805	COSM1235480
Sample 12	TP53	p.P92A	c.274C>G	SNV	unknown	NM_000546.5	-	COSM45844
Sample 13	TP53	p.A88Rfs	c.261_262insC	InDel	unknown	NM_000546.5	-	-
Sample 13	TP53	p.P92A	c.274C>G	SNV	unknown	NM_000546.5	-	COSM45844
Sample 14	CCND1		Loss (0,41)	CNV	Unknown	NM_053056	-	-
Sample 14	FGFR3		Loss (0,38)	CNV	Unknown	NM_000142	-	-
Sample 14	MYC		Gain (3,08)	CNV	Potential Clinical Significance	NM_005359.5	-	-
Sample 14	TP53	p.M160I	c.480G>T	SNV	unknown	NM_000546.5	rs772354334	COSM45674
Sample 16	PIK3CA	p.E545K	c.1633G>A	SNV	Potential Clinical Significance	NM_006218	rs104886003	COSM763
Sample 18	ALK	p.G1202R	c.3604G>A	SNV	Strong Clinical Significance	NM_004304.4	rs1057519783	COSM144250
Sample 18	ALK	p.S1206Y	c.3617C>A	SNV	Strong Clinical Significance	NM_004304.4	rs1057519782	COSM144251
Sample 18	TP53	p.?	c.919+10C>T	SNV	unknown	NM_000546.5	-	COSM45540
Sample 18	TP53	p.P250L	c.749C>T	SNV	unknown	NM_000546.5	rs1064794311	COSM10771
Sample 18	TP53	p.P92A	c.274C>G	SNV	unknown	NM_000546.5	-	COSM45844
Sample 18	TP53	p.R158C	c.472C>T	SNV	unknown	NM_000546.5	rs587780068	COSM43848
Sample 19	TP53	p.R273G	c.817C>G	SNV	unknown	NM_000546.5	rs121913343	COSM43843
Sample 20	PIK3CA	p.E545A	c.1634A>C	SNV	Potential Clinical Significance	NM_006218	rs121913274	COSM12458
Sample 20	TP53	p.S149Pfs	c.445delT	InDel	unknown	NM_000546.5	rs1064793929	COSM44099
Sample 21	EGFR	p.E746_A750del	c.2235_2249delGGAATTAAGAGAAGC	InDel	Strong Clinical Significance	NM_005228.4	-	COSM6223
Sample 21	TP53	p.R282W	c.844C>T	SNV	unknown	NM_000546.5	rs28934574	COSM10704
Sample 23	ALK	p.L1196M	c.3586C>A	SNV	Strong Clinical Significance	NM_004304.4	rs1057519784	COSM99137
Sample 23	ALK	p.R1275Q	c.3824G>A	SNV	Strong Clinical Significance	NM_004304.4	rs113994087	COSM28056
Sample 23	TP53	p.E221fs	c.662delA	InDel	unknown	NM_000546.5	-	COSM85959
Sample 23	TP53	p.I251fs	c.751_752insC	InDel	unknown	NM_000546.5	-	-
Sample 24	ALK	p.G1202R	c.3604G>A	SNV	Strong Clinical Significance	NM_004304.4	rs1057519783	COSM144250
Sample 24	TP53	p.C176Y	c.527G>A	SNV	unknown	NM_000546.5	rs786202962	COSM10687
Sample 24	TP53	p.P92A	c.274C>G	SNV	unknown	NM_000546.5	-	COSM45844
Sample 24	TP53	p.S241A	c.721T>G	SNV	unknown	NM_000546.5	rs1057520002	COSM44224
Sample 25	PIK3CA	p.I338F	c.1012A>T	SNV	Unknown	NM_006218	-	-
Sample 25	TP53	p.Q16Rfs	c.45delT	InDel	unknown	NM_000546.5	rs1555526997	COSM46341
Sample 26	ALK	p.G1202R	c.3604G>A	SNV	Strong Clinical Significance	NM_004304.4	rs1057519783	COSM144250
Sample 26	TP53	p.P92A	c.274C>G	SNV	unknown	NM_000546.5	-	COSM45844
Sample 27	MAP2K1	p.F129L	c.385T>C	SNV	Potential Clinical Significance	NM_002755.3	rs1057519805	COSM1235480
Sample 27	SMAD4	p.R361C	c.1081C>T	SNV	Unknown	NM_005359.5	rs80338963	COSM14140
Sample 27	TP53	p.P92A	c.274C>G	SNV	unknown	NM_000546.5	-	COSM45844
Sample 28	ALK	p.V1180L	c.3538G>C	SNV	Strong Clinical Significance	NM_004304.4	-	COSM4381101
Table S3. List of all somatic mutations detected in the study cohort.
